# Supplementary material for: Synthetic mycobacterial molecular patterns partially complete Freund’s adjuvant
Source: bioRxiv or medRxiv preprint supplement (doi:10.1101/699165), 2020-01-23

# FIG. S1

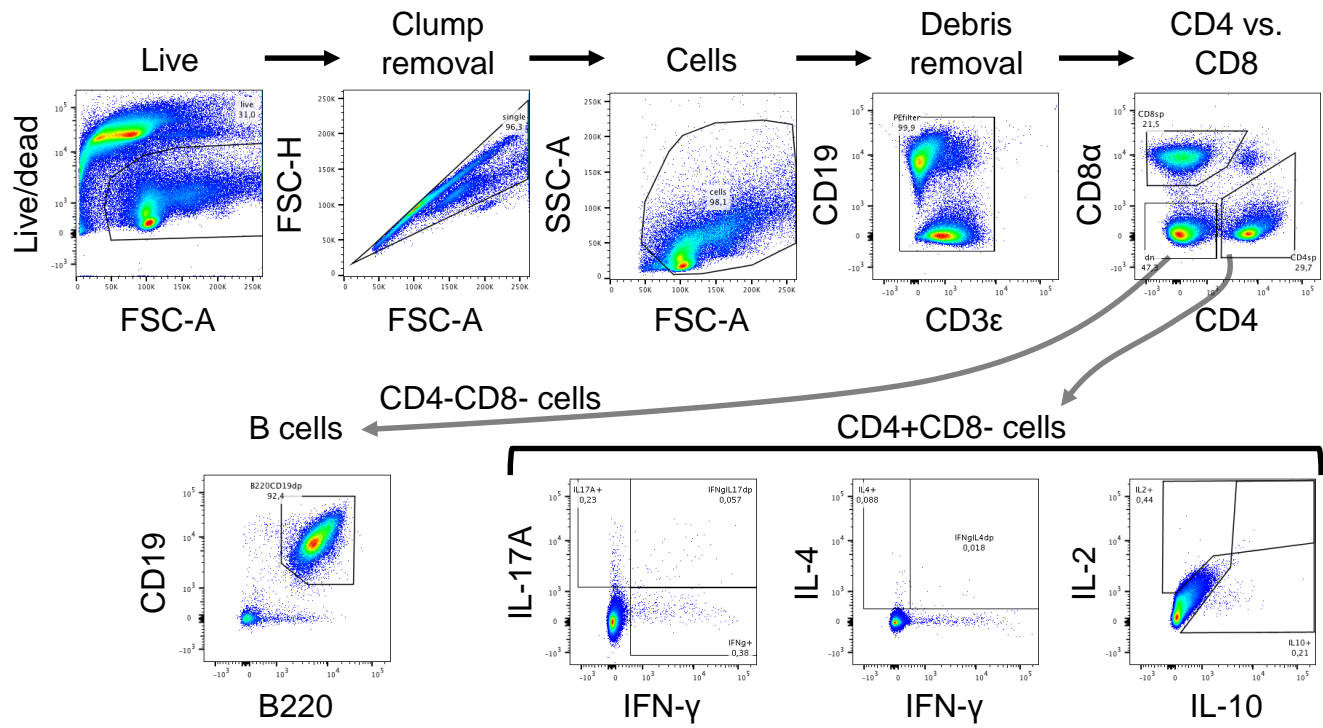

# FIG. S2

A

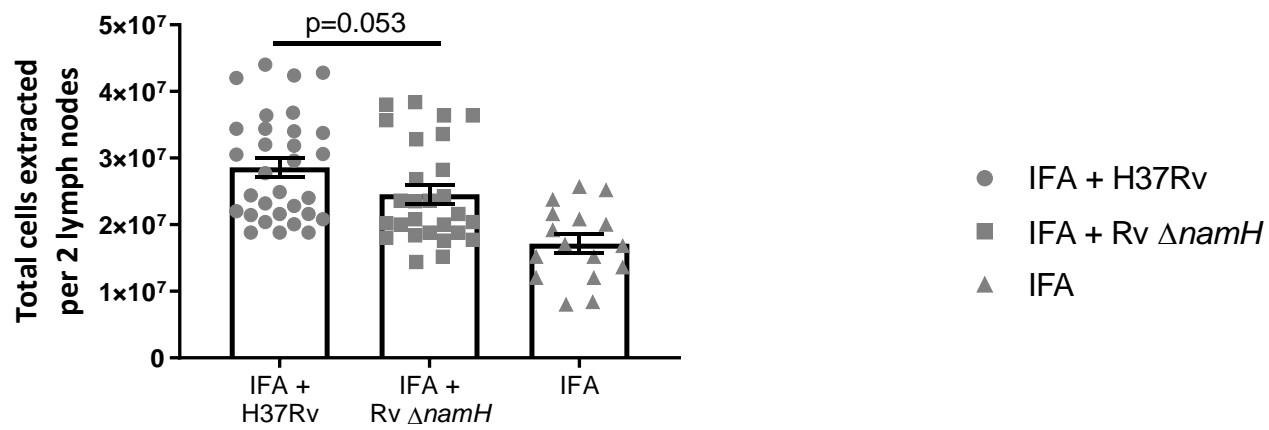

B

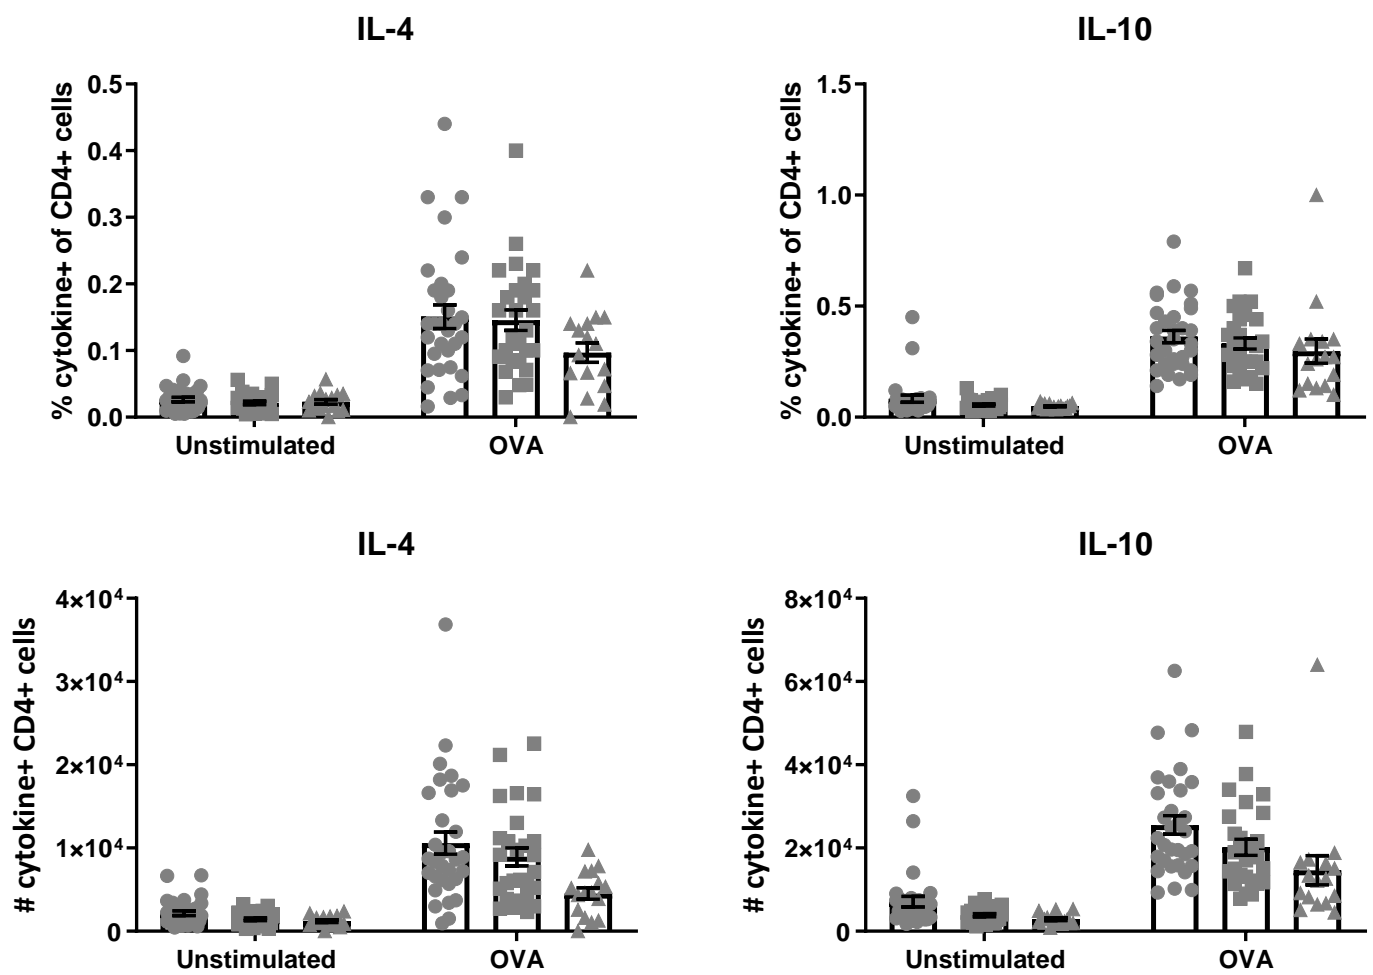

# FIG. S3

A

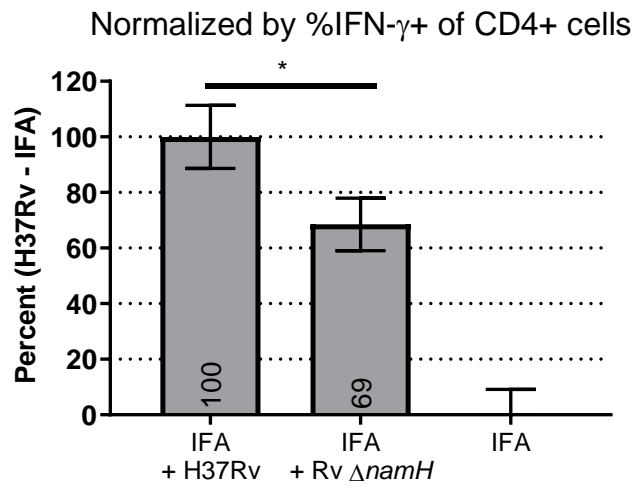

B

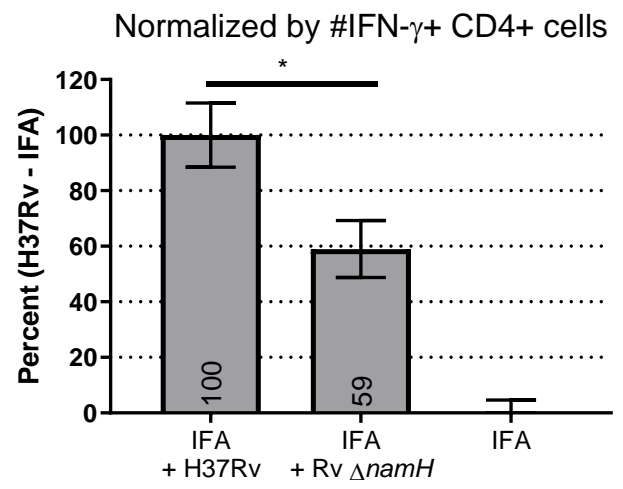

# FIG. S4

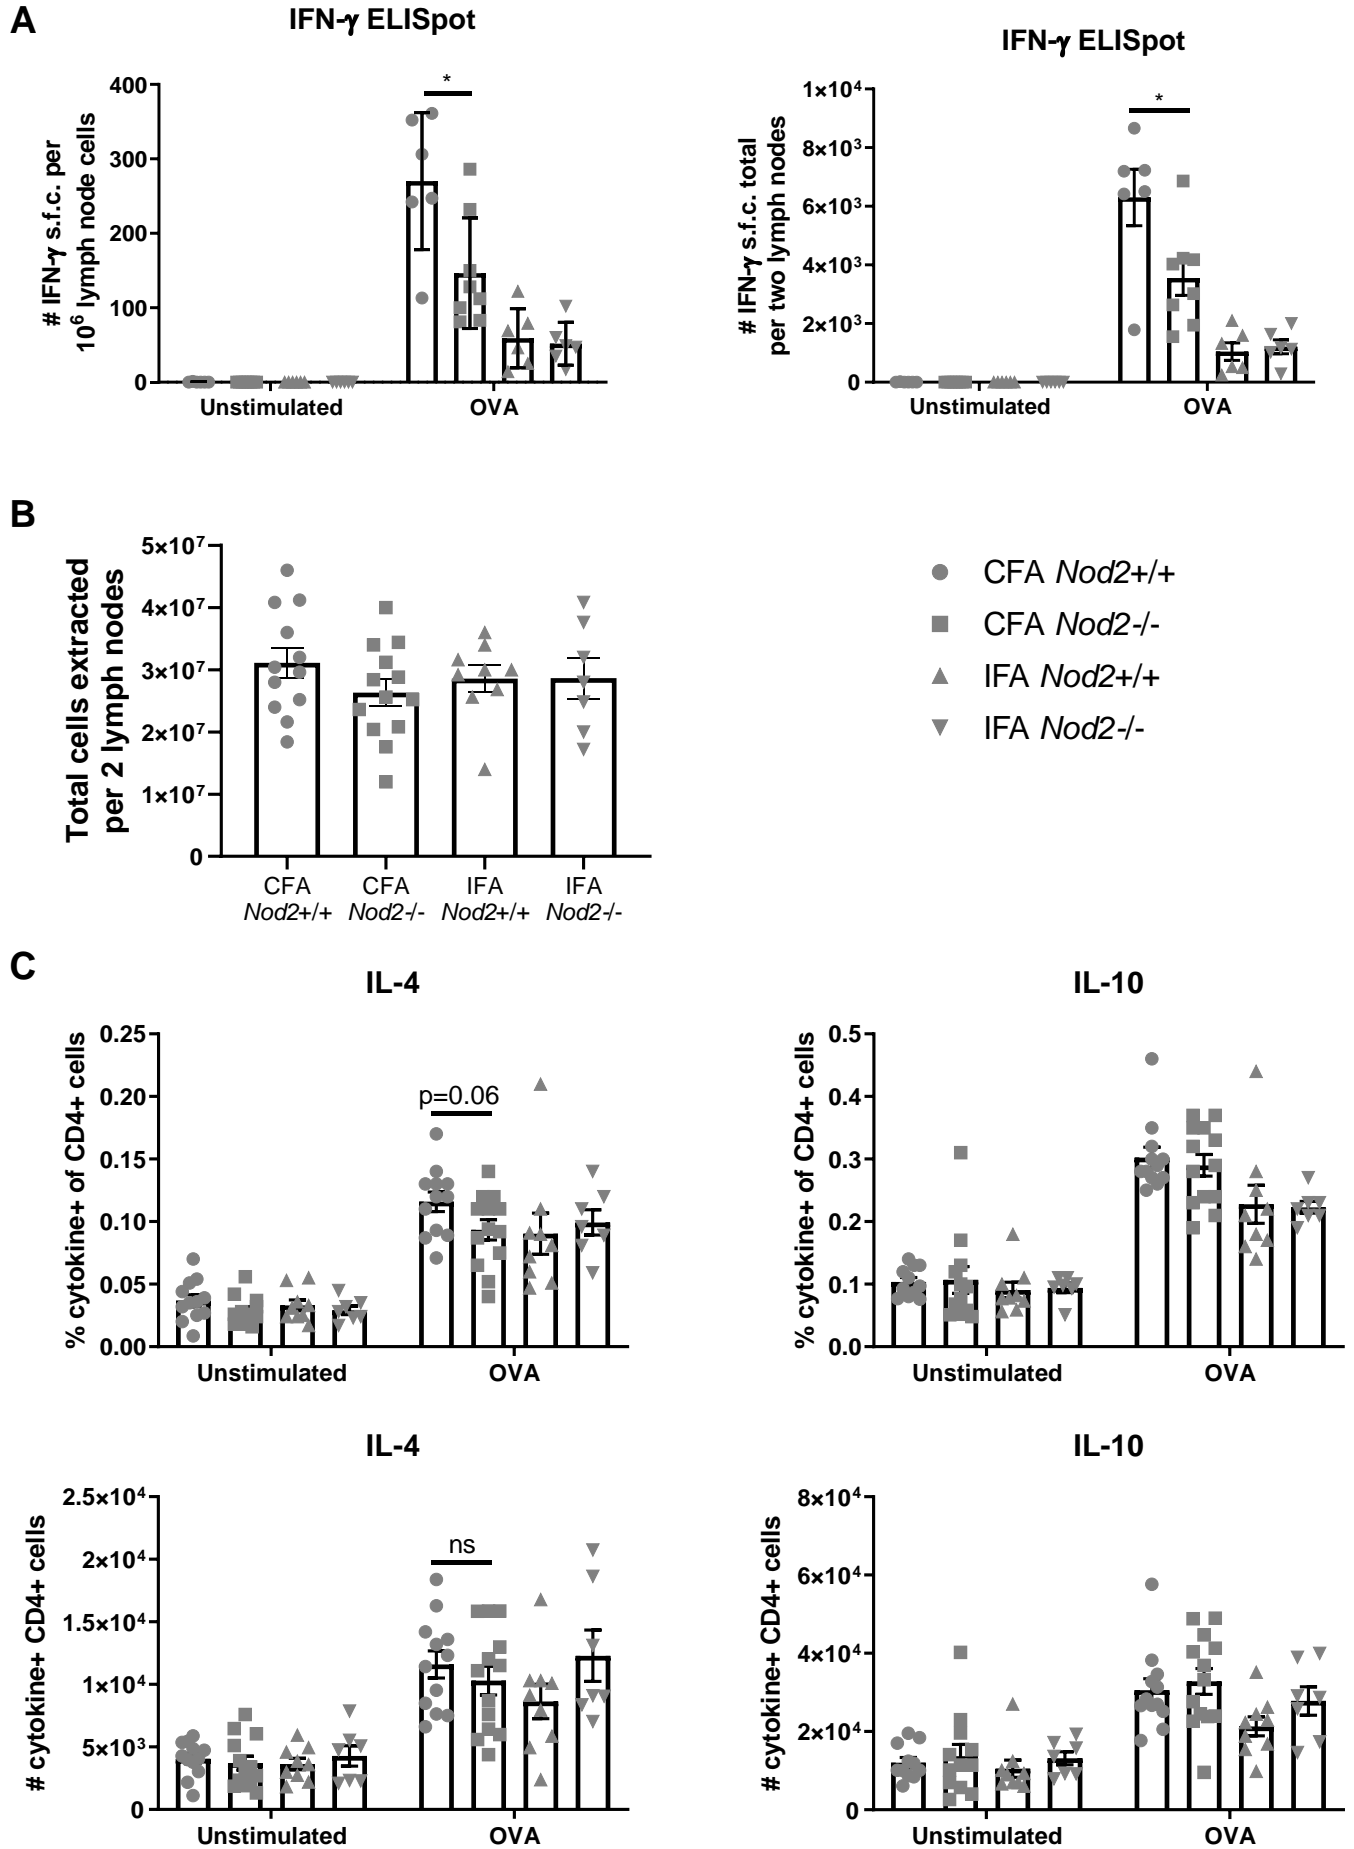

# FIG. S5

A

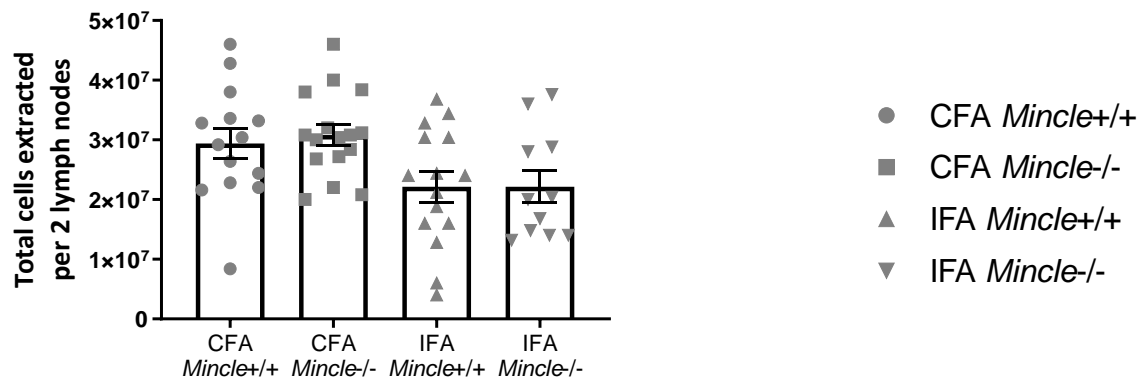

B

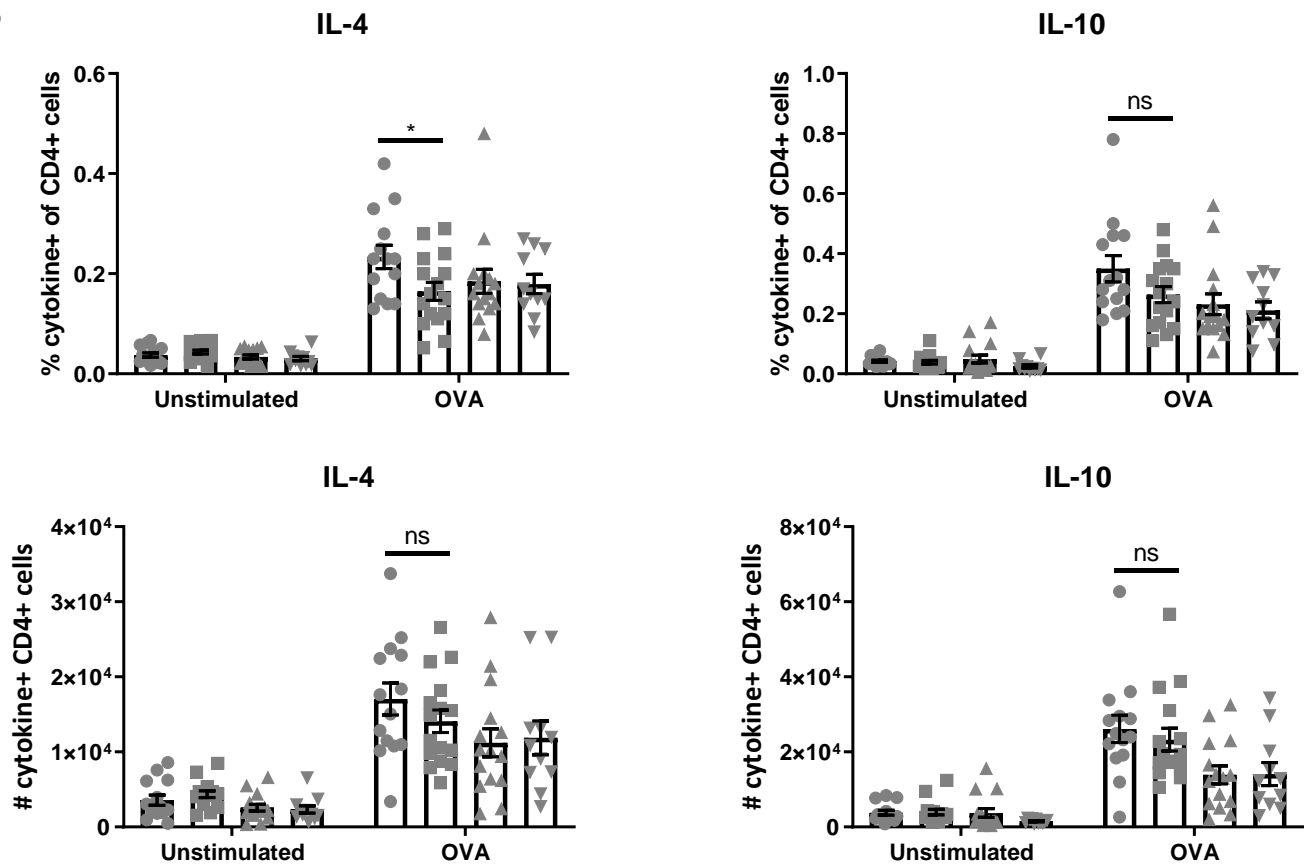

# FIG. S6

IFA +  
1  $\mu$ g  
TDM

IFA +  
10  $\mu$ g  
TDM

CFA

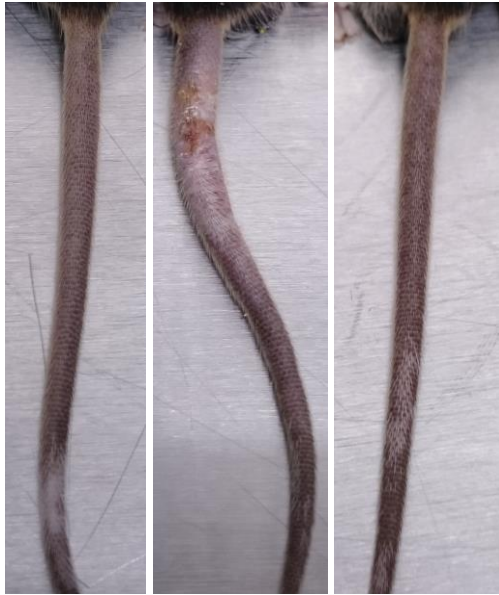

# FIG. S7

A

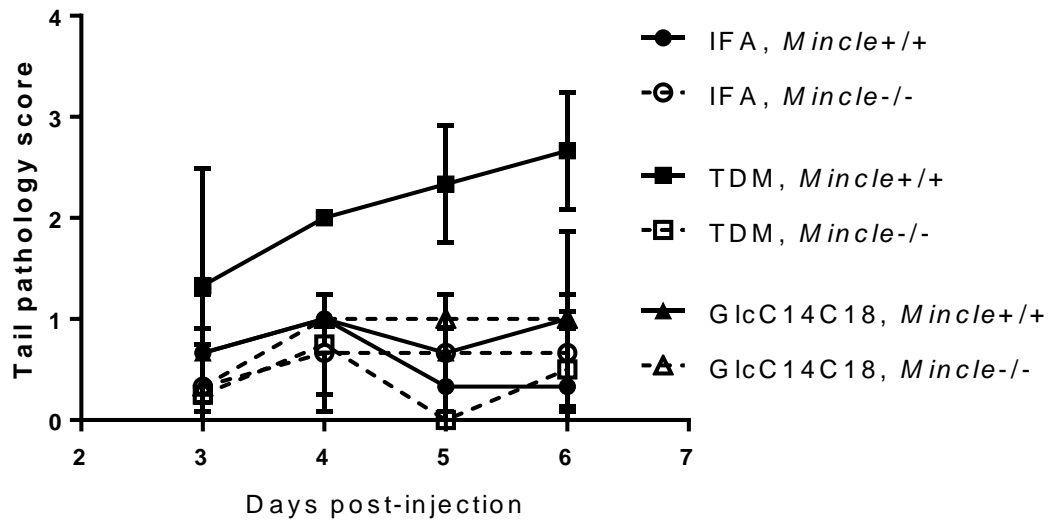

B

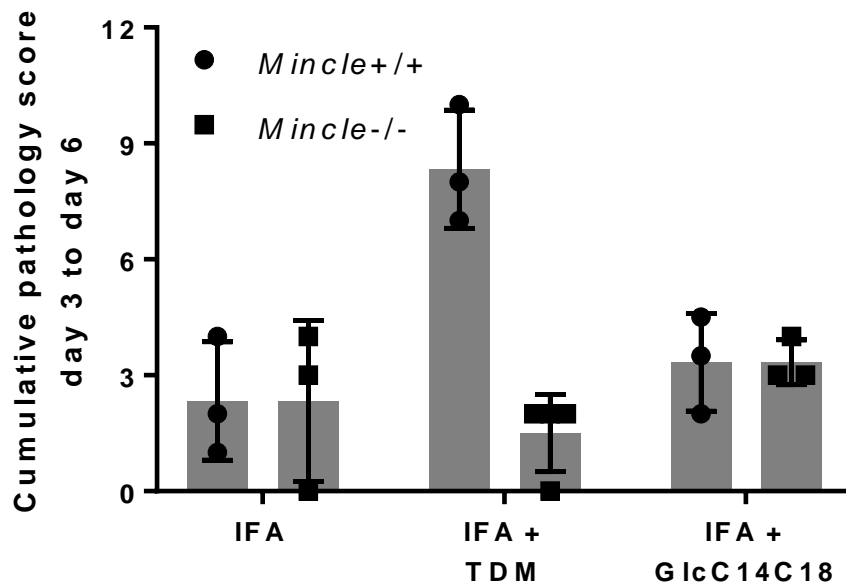

**FIG. S8**

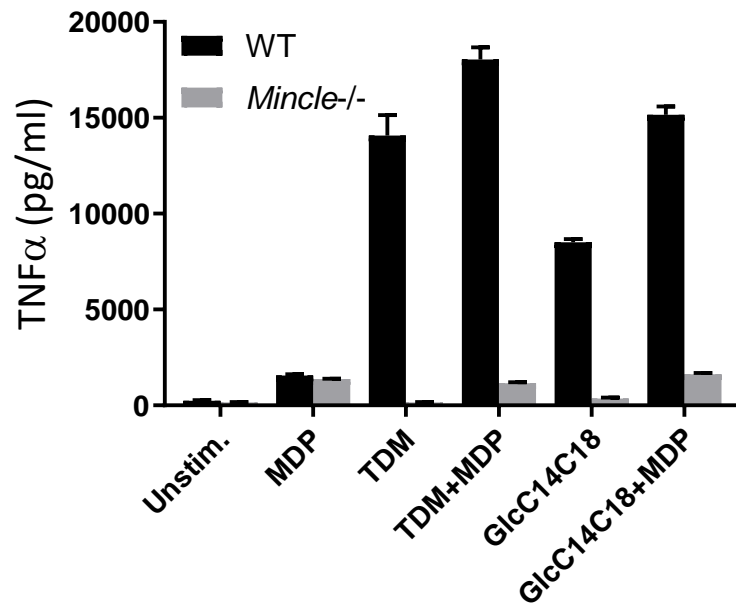



# FIG. S9

A

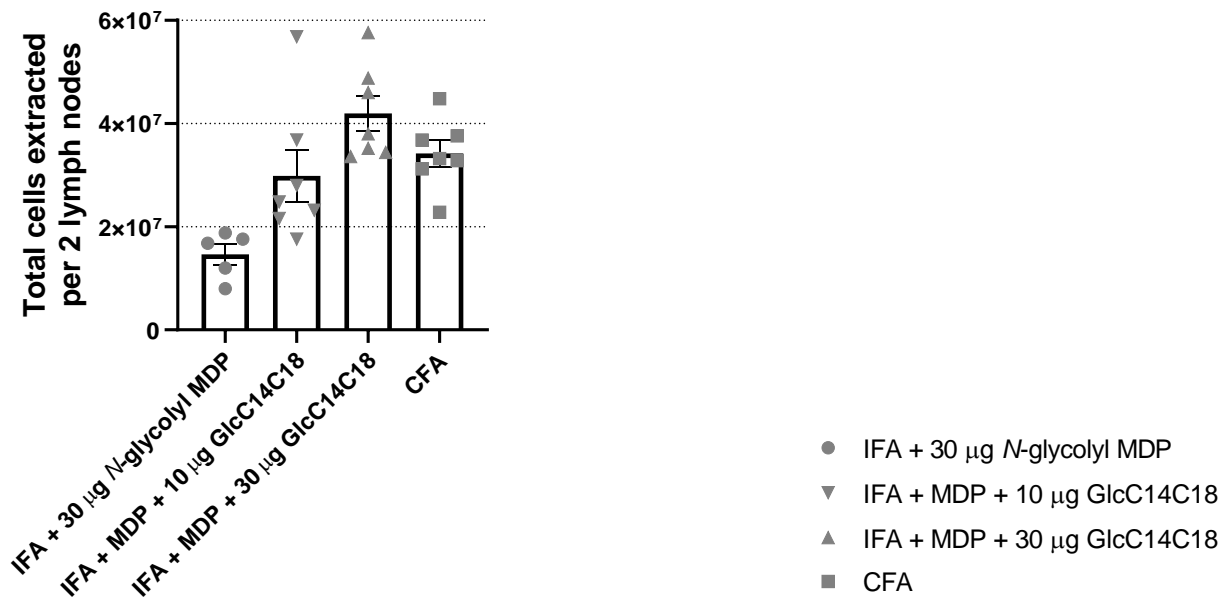

B

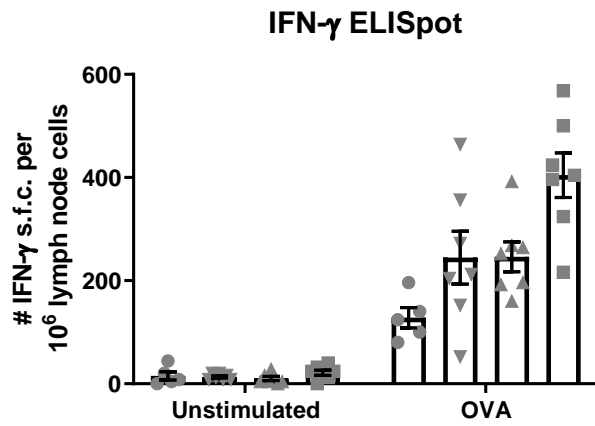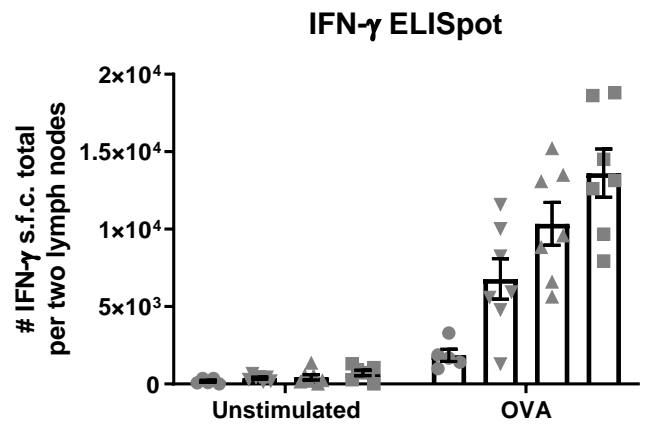

# FIG. S10

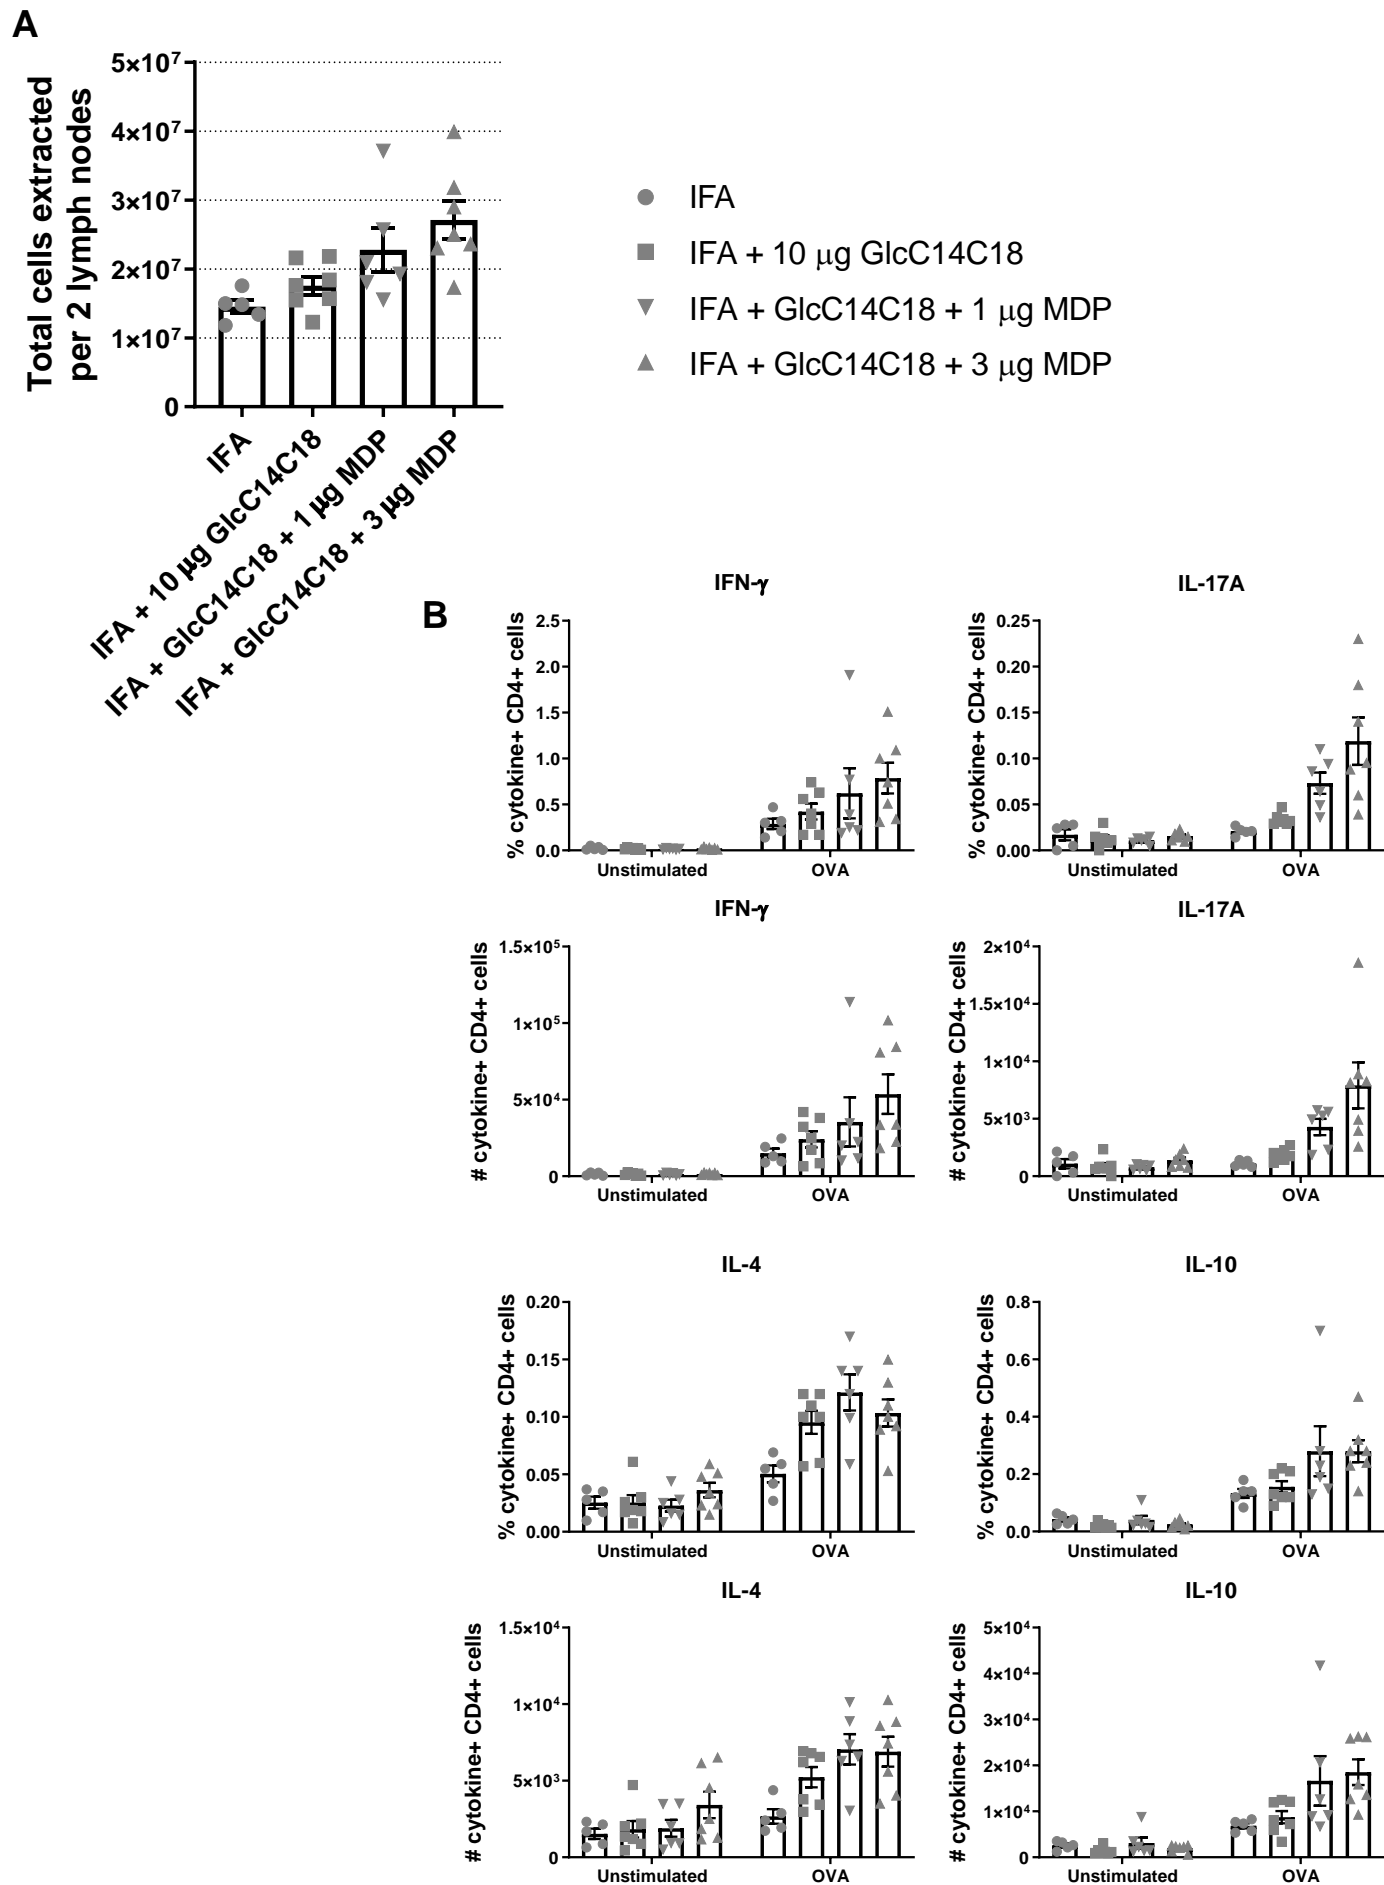

# FIG. S11

A

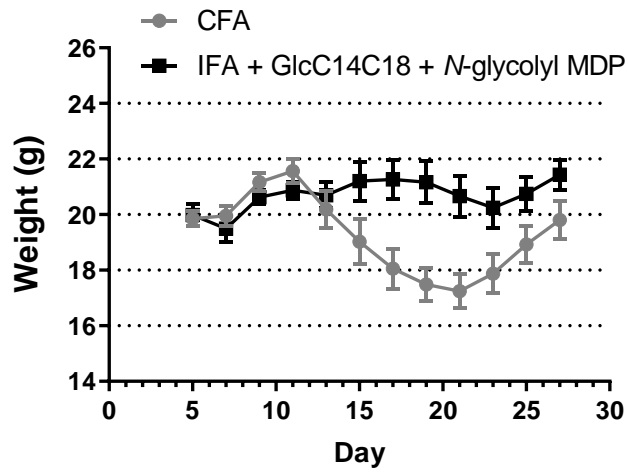

B

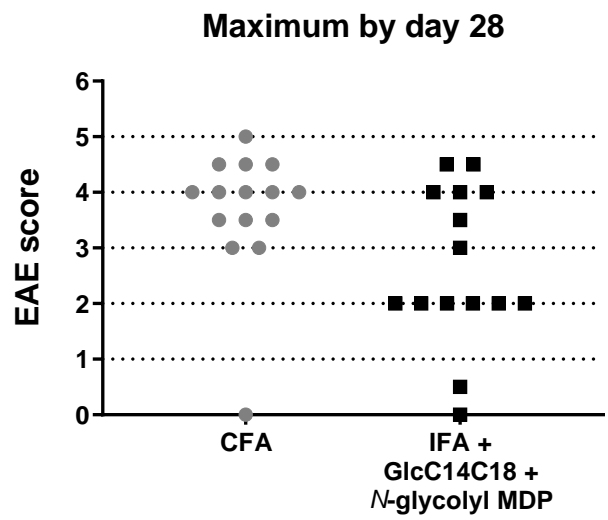

C

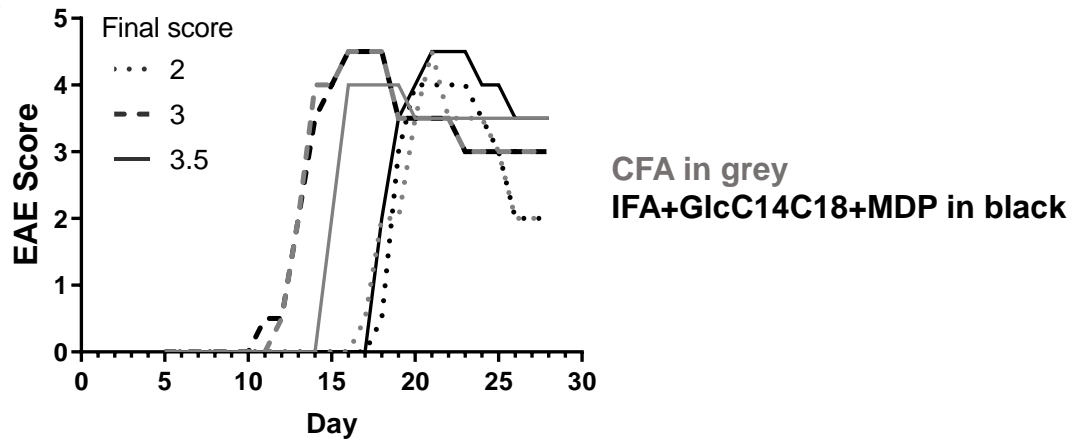

# FIG. S12

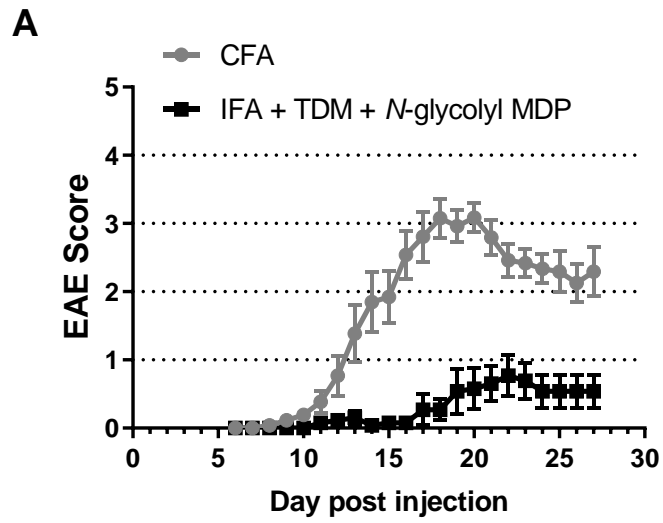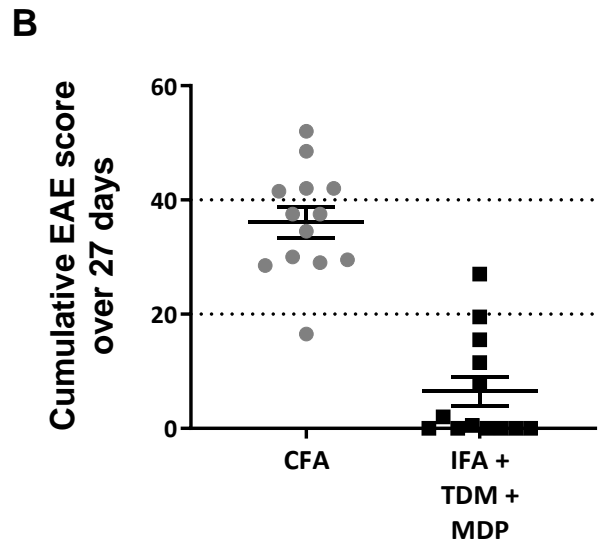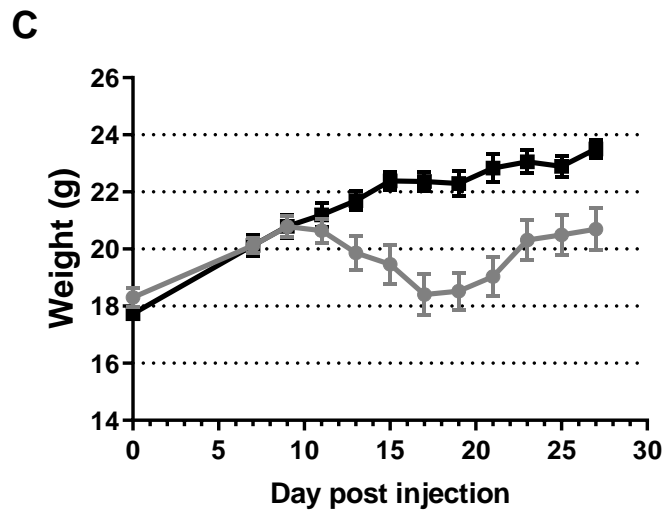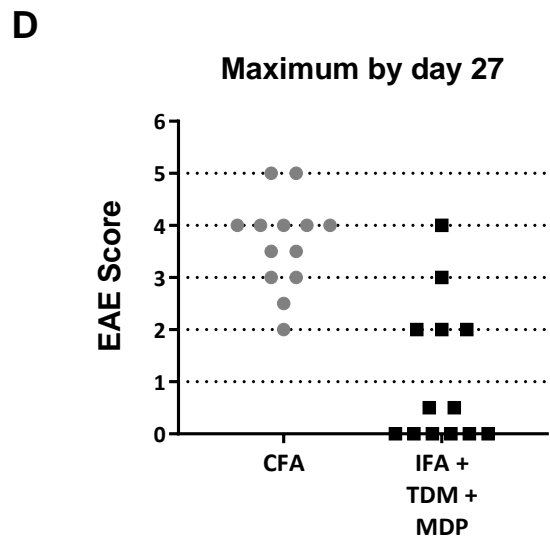

Supplement: Supplementary file [file media-1.pdf]
